# Supplementary material for: Fluoride removal from water using high-activity aluminum hydroxide prepared by the ultrasonic method
Source: Royal Society of Chemistry journal article supplement (doi:10.1039/c5ra14706a), 2015-01-01
Supplement: c5ra14706a1.pdf [file c5ra14706a1.pdf]

## Supplementary Material

### Fluoride Removal from Water Using High-Activity Aluminum Hydroxide

#### Prepared by the Ultrasonic Method

Wei-Zhuo Gai<sup>a,b</sup>, Zhen-Yan Deng<sup>a,\*</sup> and Ying Shi<sup>b</sup>

*<sup>a</sup>Energy Materials & Physics Group, Department of Physics, Shanghai University,  
Shanghai 200444, China*

*<sup>b</sup>School of Materials Science and Engineering, Shanghai University, Shanghai  
200444, China*

\*Author to whom correspondence should be addressed. Tel: +86-21-66134334, Fax:  
+86-21-66134208, E-mail: zydeng@shu.edu.cn

#### 1. Adsorption dynamics

The adsorption kinetics describes the rate of adsorbate uptake on adsorbent, which determines the adsorption equilibrium time. Understanding of adsorption kinetics is helpful for modeling the adsorption process and designing adsorption-based water treatment systems. Pseudo-first-order and pseudo-second-order adsorption kinetic models were used to analyze the experimental data for the F<sup>-</sup> adsorption onto UAH.

The pseudo-first-order adsorption kinetic model is expressed as follows<sup>1</sup>

$$\log(q_e - q_t) = \log q_e - \frac{k_1}{2.303} t \quad (\text{S1})$$

where  $q_e$  and  $q_t$  are the amounts of  $\text{F}^-$  adsorbed (mg/g) at equilibrium and at time  $t$ , respectively, and  $k_1$  is the adsorption rate constant, which can be determined from the slope of linear plot of  $\log(q_e - q_t)$  versus  $t$ .

The pseudo-second-order adsorption kinetic model is expressed as follows<sup>1</sup>

$$\frac{t}{q_t} = \frac{1}{k_2 q_e^2} + \frac{1}{q_e} t \quad (\text{S2})$$

where  $k_2$  is the adsorption rate constant, which can be determined by plotting  $t/q_t$  versus  $t$ .

Fig. S1 shows the pseudo-first-order and pseudo-second-order kinetic plots for the fluoride removal from solution with different initial  $\text{F}^-$  concentration using UAH at 25°C. The kinetic parameters for pseudo-first-order and pseudo-second-order kinetic models are given in Table S1. From the correlation coefficient  $R^2$ , it can be seen that the adsorption kinetics data for UAH fit better with the pseudo-second-order kinetic model, indicating that  $\text{F}^-$  adsorption onto UAH follows the second-order adsorption.

## 2. Adsorption isotherm

Langmuir, Freundlich and Dubinin-Radushkevich (D-R) adsorption isotherm models were used to analyze the experimental data for  $\text{F}^-$  adsorption onto UAH. The Langmuir isotherm model assumes that adsorption takes place on a homogenous surface by monolayer adsorption without interaction between adsorbate species, which is given by the following equation<sup>2</sup>

$$\frac{1}{q_e} = \left(\frac{1}{q_{\max} K_L}\right) \frac{1}{C_e} + \frac{1}{q_{\max}} \quad (\text{S3})$$

where  $q_{\max}$  is the maximum theoretical amount of  $F^-$  adsorbed on adsorbent,  $C_e$  is the equilibrium concentration of  $F^-$  in solution and  $K_L$  is the binding energy constant.

The Freundlich isotherm is based on non-ideal adsorption on heterogeneous surfaces as well as for multilayer adsorption, which is given by the following equation<sup>2</sup>

$$\log q_e = \log K_F + \frac{1}{n} \log C_e \quad (\text{S4})$$

where  $K_F$  is isotherm constant, and  $n$  is the Freundlich constant related to the favorable degree of adsorption. When the value of  $n$  is between 1 and 10, the adsorption is beneficial.

Fig. S2 shows Langmuir and Freundlich adsorption isotherm plots for the fluoride removal from aqueous solution using UAH at 25°C. The parameters of Langmuir and Freundlich adsorption isotherms for  $F^-$  adsorption onto UAH are given in Table S2. It can be seen that the adsorption experimental data fit better with Freundlich isotherm model, indicating that  $F^-$  adsorption on UAH is multilayer adsorption. The value of  $n$  is 3.054, implying that  $F^-$  adsorption onto UAH is beneficial.

In order to analyze whether the adsorption is physical or chemical adsorption, D-R adsorption isotherm model was used to analyze the experimental data, which is described by the following equation<sup>2</sup>

$$\ln q_e = \ln q_{\max} - K\varepsilon^2 \quad (\text{S5})$$

where  $K$  is a constant related to the adsorption energy, and the Polanyi potential  $\varepsilon$  is

given by

$$\varepsilon = RT \ln\left(1 + \frac{1}{C_e}\right) \quad (\text{S6})$$

where  $R$  is the gas constant and  $T$  is the adsorption temperature.

Fig. S3 shows D-R isotherm plots for the fluoride removal using UAH at different temperatures. The parameters of D-R adsorption isotherms for  $\text{F}^-$  adsorption onto UAH are given in Table S3. From the value of  $R^2$ , it can be seen that the experimental data fit well with the D-R isotherm model. The value of  $q_{\text{max}}$  decreases with increasing the temperature, also indicating that  $\text{F}^-$  adsorption onto UAH is an exothermic process.

The  $K$  values can be used to calculate the adsorption energy,  $E$ , using the following equation<sup>2</sup>

$$E = (2K)^{-1/2} \quad (\text{S7})$$

and  $E$  can be used to estimate the adsorption type. If the value of  $E$  is between 8 and 16 kJ/mol, the adsorption process is chemical adsorption; if  $E$  is below 8 kJ/mol, the adsorption process is physical adsorption.<sup>2</sup> The calculated adsorption energy  $E$  for UAH is  $\sim 10$  kJ/mol, indicating that  $\text{F}^-$  adsorption onto UAH is a chemical adsorption process.

### 3. Thermodynamic study

To evaluate the thermodynamic feasibility of the adsorption process, three basic thermodynamic parameters, standard enthalpy ( $\Delta H^0$ ), standard entropy ( $\Delta S^0$ ) and standard free energy ( $\Delta G^0$ ) were calculated using the following equations<sup>3</sup>

$$\log\left(\frac{q_e}{C_e}\right) = \frac{\Delta S^0}{2.303R} - \left(\frac{\Delta H^0}{2.303R}\right) \frac{1}{T} \quad (\text{S8})$$

$$\Delta G^0 = \Delta H^0 - T\Delta S^0 \quad (\text{S9})$$

where  $q_e/C_e$  is the adsorption affinity. The thermodynamic parameters were calculated from the plot of  $\log(q_e/C_e)$  versus  $1/T$  for defluoridation test using UAH at an initial F<sup>-</sup> concentration of 20 mg/L, as shown in Table S4. The  $\Delta H^0$  for F<sup>-</sup> adsorption onto UAH is -9.113 kJ/mol, indicating that F<sup>-</sup> adsorption is an exothermic process. The  $\Delta G^0$  for F<sup>-</sup> adsorption is about -18 kJ/mol, and the negative value of  $\Delta G^0$  suggests that F<sup>-</sup> adsorption onto UAH is favorable and spontaneous in nature.

## References

- 1 Y. Shan and H.M. Guo, *Chem. Eng. J.*, 2013, **223**, 183-191.
- 2 A. L. Srivastav, P. K. Singh, V. Srivastava and Y. C. Sharma, *J. Hazard. Mater.*, 2013, **263**, 342-352.
- 3 X. L. Zhao, J. M. Wang, F. C. Wu, T. Wang, Y. Q. Cai, Y. L. Shi and G. B. Jiang, *J. Hazard. Mater.*, 2010, **173**, 102-109.

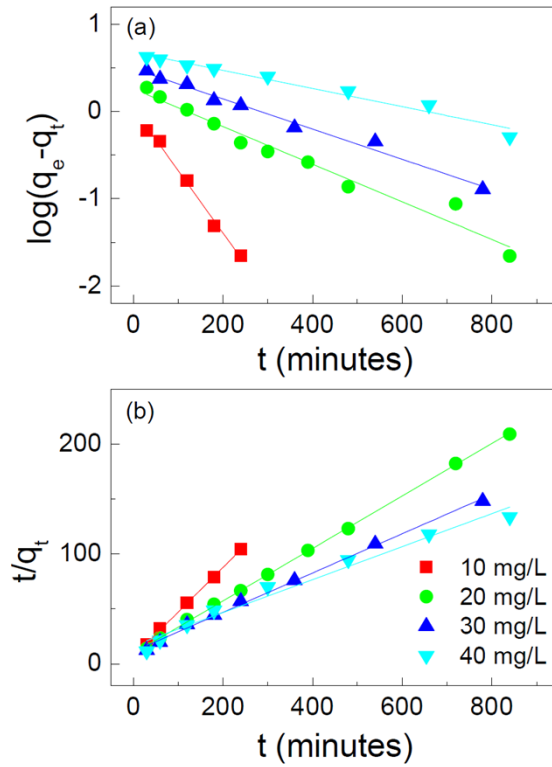

**Fig. S1.** (a) Pseudo-first order kinetic and (b) pseudo-second order kinetic plots for fluoride removal from aqueous solution with different initial  $F^-$  concentrations using UAH at 25°C.

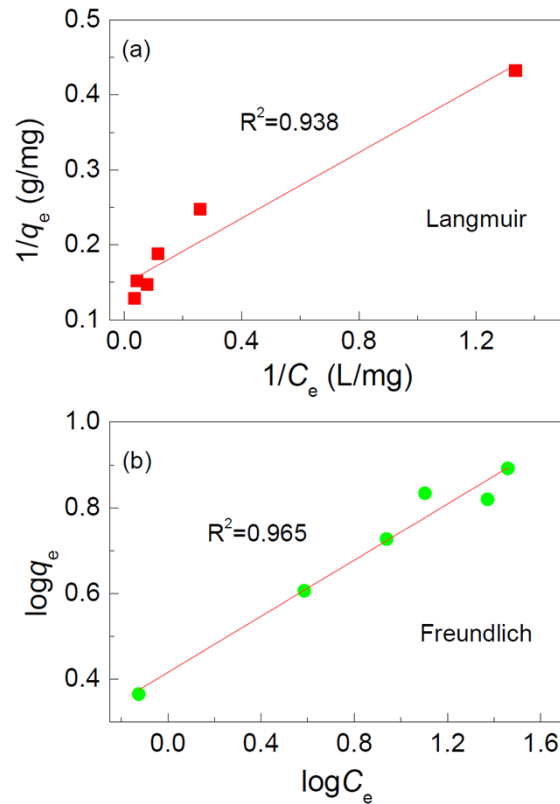

**Fig. S2.** (a) Langmuir adsorption isotherm and (b) Freundlich adsorption isotherm plots for fluoride removal from aqueous solution using UAH at 25°C.

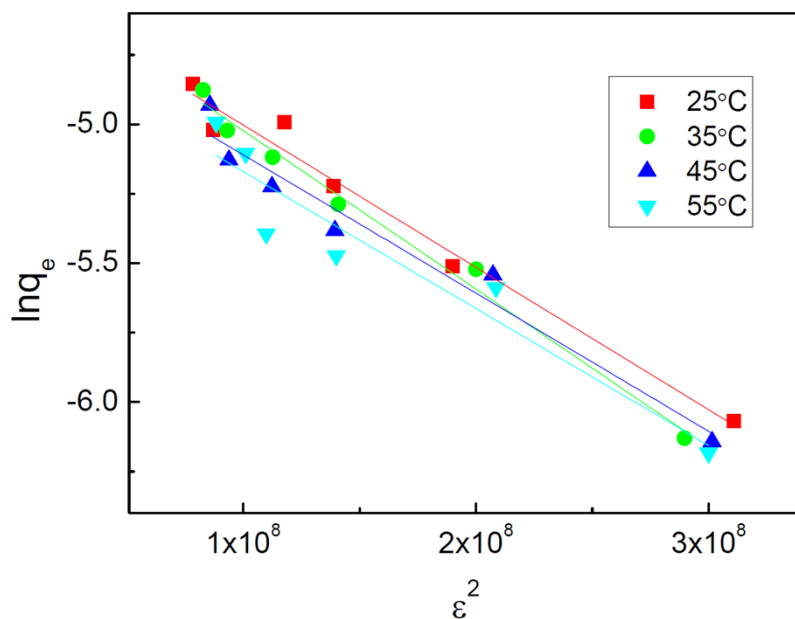

**Fig. S3.** Dubinin-Radushkevich isotherm plots for fluoride removal from aqueous solution using UAH.

**Table S1** Kinetic parameters of pseudo-first-order and pseudo-second-order models for F<sup>-</sup> adsorption by UAH at 25°C.

| $C_0$<br>(mg/L)* | Pseudo-first-order         |              |       | Pseudo-second-order |              |       |
|------------------|----------------------------|--------------|-------|---------------------|--------------|-------|
|                  | $k_1$ (min <sup>-1</sup> ) | $q_e$ (mg/g) | $R^2$ | $k_2$ (g/mg min)    | $q_e$ (mg/g) | $R^2$ |
| 10               | 0.016                      | 1.091        | 0.992 | 1.044               | 2.459        | 0.999 |
| 20               | 0.005                      | 1.813        | 0.967 | 0.541               | 4.186        | 0.999 |
| 30               | 0.004                      | 3.089        | 0.985 | 0.357               | 5.594        | 0.996 |
| 40               | 0.002                      | 4.771        | 0.963 | 0.374               | 6.664        | 0.963 |

\* $C_0$  is the initial F<sup>-</sup> concentration in aqueous solution.

**Table S2** Parameters for Langmuir and Freundlich isotherm models for F<sup>-</sup> adsorption by UAH at 25°C.

| Langmuir parameters |              |       | Freundlich parameters |       |       |
|---------------------|--------------|-------|-----------------------|-------|-------|
| $q_{\max}$ (mg/g)   | $K_L$ (L/mg) | $R^2$ | $K_F$                 | $n$   | $R^2$ |
| 6.776               | 0.674        | 0.938 | 2.604                 | 3.054 | 0.965 |

**Table S3** Parameters for D-R isotherm model for F<sup>-</sup> adsorption by UAH.

| Temperature (K) | $q_m$ (mg/g) | $K$                   | $R^2$ | $E$ (kJ/mol) |
|-----------------|--------------|-----------------------|-------|--------------|
| 298             | 11.2         | $5.13 \times 10^{-9}$ | 0.974 | 9.88         |
| 308             | 10.5         | $5.70 \times 10^{-9}$ | 0.986 | 9.36         |
| 318             | 9.9          | $4.98 \times 10^{-9}$ | 0.953 | 10.02        |
| 328             | 9.3          | $4.93 \times 10^{-9}$ | 0.893 | 10.07        |

**Table S4** Thermodynamic parameters for F<sup>-</sup> adsorption by UAH.

| $\Delta H^0$<br>(kJ/mol) | $\Delta S^0$<br>(J/mol K) | $R^2$ | $\Delta G^0$ (kJ/mol) |         |         |         |
|--------------------------|---------------------------|-------|-----------------------|---------|---------|---------|
|                          |                           |       | 25°C                  | 35°C    | 45°C    | 55°C    |
| -9.113                   | -9.688                    | 0.857 | -17.325               | -17.600 | -17.876 | -18.151 |
